# Supplementary material
Source: PubMed Central journal article supplement (PMC3318018)
Supplement: supp_88.11.991_JDR349454_Online_Appendix_Rev.pdf [file supp_88.11.991_JDR349454_Online_Appendix_Rev.pdf]

## RESEARCH REPORTS

Clinical

Y. Ding<sup>1,2</sup>, M.R.P. Estrella<sup>3</sup>, Y.Y. Hu<sup>1</sup>, H.L. Chan<sup>1</sup>,  
H.D. Zhang<sup>2</sup>, J.-W. Kim<sup>4</sup>, J.P. Simmer<sup>1</sup>,  
and J.C.-C. Hu<sup>1\*</sup>

<sup>1</sup>Department of Biologic and Materials Sciences, University of Michigan School of Dentistry, 1011 N. University, Ann Arbor, MI 48109-1078, USA; <sup>2</sup>Department of Stomatology, Union Hospital, Tongji Medical College, Huazhong University of Science and Technology, 1277 Jiefang Avenue, Wuhan, Hubei 430022, China; <sup>3</sup>Department of Orthodontics and Pediatric Dentistry, University of Michigan School of Dentistry, Ann Arbor, MI, USA; and <sup>4</sup>Department of Cell and Developmental Biology & Dental Research Institute, School of Dentistry, Seoul National University, 275-1 Yongon-dong, Chongno-gu, Seoul 110-768, Korea; \*corresponding author, University of Michigan Dental Research Lab, 1210 Eisenhower Place, Ann Arbor, MI 48108, USA, janhu@umich.edu

*J Dent Res* 88(11):991-996, 2009

# Fam83h is Associated with Intracellular Vesicles and ADHCAI

## APPENDIX

### Human Fam83 Sequences in Alignment

| Gene   | Location        | No of AA | Accession #  |
|--------|-----------------|----------|--------------|
| FAM83H | 8q24.3          | 1179 aa  | NM_198488    |
| FAM83A | 8q24.13         | 434 aa   | NM_032899    |
| FAM83B | 6p12.1          | 1011 aa  | NM_001010872 |
| FAM83C | 20q11.22        | 747 aa   | NM_178468    |
| FAM83D | 20q11.22-q12    | 615 aa   | NM_030919    |
| FAM83E | 19q13.32-q13.33 | 478 aa   | NM_017708    |
| FAM83F | 22q13.1         | 500 aa   | NM_138435    |
| FAM83G | 17p11.2         | 823 aa   | NM_001039999 |

### Human Fam83 Alignment Summary

MARRSQSSSQDNPLAPGYLPPHYKEYYRLAVDALAEGGSEAYSRFLATEGAPDFLCP  
LEHVSRLRPPQYVTTREPPESLLDMDGSSGTYPVNSDQAVPELDELGWPLTFGQGT  
EVTTLVQPPPPSPSIKDEARRMTRSAQQ/2-3/VVAVVMDMFTDLDLLSEVLEAAARRV  
PVYILLDEMNQHFLLDMADKCRVNLHVD/3-4/FLRVRTVAGPTYCRGTGKSFKGHVKE  
KELLVDCAVVMSGSYS/4-5/FMWSFEKIHRS LAHVFOGELVSSFDEEFRLFAQSEPLV  
PSAAALARMDAYALAPYAGAGPLVGVPGVGAAPTFFSFPKRAHLLFPPPREEGLGFPSFLD  
PDRHFLSAFRREPPRMPGGALEPHAGLRPLSRRLAEAGPAGELAGARGFFQARHLEMD  
AFKRHSFATEGAGAVENFAAARQVSRQTFLSHGDDFRFQTSHFHRDQLYQQYQWDPQLT  
PARPQGLFEKLRGGRAGFADDDFTLGAGPRFPELGPDPGHQRLDYPSSASREVRHGSDP  
AFAPGPRGLEPSGAPRPNLTQRFPCQAAARPGDPAPEAEPERRGGPEGRAGLRWRLAS  
YLSGCHGEDGGDDGLPAPMEAEAYEDDVLAPGGRAPAGDLLPSAFRVPAAFPTKVPVPGP  
GSGGNGPEREGPEEPGLAKQDSFRSRLNPLVQRSSRLRSLSLIFSTSQAEGAAGAAAATEK  
VQLLHKEQTVSETLPGGGEAVRSAASTKVAELLEKYKGPARDPGGAGAITVASHSKAVV  
SQAWREEVAAPGAVGGERRSLESCLLDLRDSFAQQLHQEAERQPGAASLTAAQLLDTLGR  
SGSDRLPSRFLSAQSHSTSPQGLDPSPLPLEGSGAHQVVLHNEKSGSPTSAYPERKGSPTPG  
FSTRRSPTTGFIEQKGSPTSAYPERRGSPVPPVPERRSSPVPPVPERRGSLTLTISGS  
PKAGPAEBGPGSPMEVLRKGSRLRLRQLLSPKGERMEDEGGFPVQENGQPESPRRLSLG  
QGDSTEAATEERGPRARLSSATANALYSNLRDDTKAILEQISAHGQKHRVAPAPSPGPT  
HNSPELGRPPAAGVLPADMSDKDKCSAIFRSDSLGTQGRLSRTLPAEERDRLLRSMES  
MRKEKRVYSRFEVFCKEEASSPGAGEGPAEEGTRDSKVGKFPVKILGTFKSKK

Identical in all

High homology

Variable

Appendix Figure 1. CLUSTAL 2.0.10 multiple sequence alignment of human FAM83 family of proteins.

Key: \* identical amino acids in all; : Mostly Homologous; . Homologous

FAM83C -----MFGGPGPGVLGAQGMAGPLRGRVEELKLPWWRESSPLV--LRHSE 43
FAM83A -----MSRSRHLGKIRKRLLEDVKSQWVR-PARAD--FSDNE 33
FAM83G -----MAFSQVQCLDDNHVNWRSSSESKPE--FFYSE 29
FAM83F -----MAESQLNCLDEAHVNEKVTEAQAA--FFYCE 29
FAM83E -----MAASQLAALEGVDSGPRVPGASPG--FLYSE 29
FAM83H -----MARRSQSSSQGDNPLAPGYLP--PHYKE 26
FAM83D MARACLIQRLPIKRDCPTVFVRGLSSPSAAMALLSEGLDEVPAACLSPCGPPNPTELFSE 60
FAM83B -----METSSMLSSLNDECKSDNYIEP---HYKE 26

FAM83C AARLAADALLERGEAAAYLRVISEERELPFLSALDVDYMTSHVRGGPELSEAQQG----- 97
FAM83A SARLATDALLDGGSEAYWRVLSQEGEVDFLSSVEAQYIQAQAREPPCPPDTLGG----- 87
FAM83G EQRLALEALVARGRDAFYEVVKRENIRDFLSELELKRILETIEVYDPGSEDPRGTGPSQG 89
FAM83F RRRAALEALLGGGEQAYRERLKEEQRLRDFLSSPERQALRAAWSPYEDAVPAANARGKSK- 88
FAM83E GQRLALEALLSKGAEAFQTCVQREELWPFLLSADEVQGLAAAAEDWTVAKQEPSG----- 83
FAM83H YYRLAVDALAEGGSEAYSRLFATEGAPDFLCPEELEHVSRHLRPPQYVTREPPE----- 80
FAM83D SRRLALEELVAGGPEAFAAFLRRERLARFLNPDEVHAILRAAERPGEEGAAAAA----- 114
FAM83B WYRVAIDILIEHGLEAYQEFVLVQERVSDFLAEEEEINYILKNVQKVAQSTAHGTD----- 80
\* \* : \* \* \* : : \* \*\* : . :

FAM83C -----EASGPDRLSLLSEVTSGTYFPMASDIDPPDLDLGWPEVPQ--ATGFSPT 144
FAM83A -----AEAGPKGLDS-SSLQSGTYFPVASEGSEPALLHSWASAEEK--PYLKEKS 133
FAM83G PEDNGVGDGEEASGADGVPIEAEPPLPSLEYWPKSDRSIPQLDLGWPDITIA--YRGVTRA 147
FAM83F -----AKAKAPAPAPAESGESLAYWPDSDTEVPPLDLGWTDTGF--YRGVSRV 135
FAM83E -----MAEGATTTDVDAGLSYWPQSEQPAPVLRLLGWVSDA--WKGITRA 128
FAM83H -----GSLLDVDMDGSSGTYFPVNSDQAVPELDLGLWPLTFG--FQGETVT 123
FAM83D -----AAEDSFGSSHDCSSGTYFPEQSDLEPPLLELGPAPAFYQAYRGATRV 161
FAM83B -----DSCDDTLSSGTYWPVESDVEAPNLDLGPYPVMPG-LLGGTHI 121
\* \*:\* \* : \* \* .\*

FAM83C QAVVHFQRDKAK---NIKDLLRFLFSQAHTVVAVVMDIFDTMELLCDLMEASSRRGVPVY 201
FAM83A SATVYFQTVKHN---NIRDLVRRICITRTSQVLVILMDVFTDVEIFCDILEANKRGVFVC 190
FAM83G SVYMQPPIDGQA---HIKEVVRKMSQAQKVIIVVMDMFTDVDIFKDLLDAGFKRKVAVY 204
FAM83F TLFTHPPKDEKAP---HLKQVVRQMIQQAQKVIIVVMDLFTDGDIFQDIVDAACKRRVPVY 193
FAM83E QLYTQPPGEGQP---PLKELVRLEIQAAHKLAVVMDVFTDPDLLLLDLVDAATRWRVPVY 185
FAM83H TLVQPPPPDPS---IKDEARRMIRSAQQVVAVVMDMFTDVDLLSEVLEAAARR-VPVY 178
FAM83D ETHFQPRGAGEGGPYGCKDALRQQLRSAREVIAVVMDVFTDIDIFRDLQEICRKQGVAVY 221
FAM83B DLLFHPPRAHLLT---IKETIRKMIKEARKVIALVMDIFTDVDIFKEIVEASTRG-VSVY 177
:: \* : : ::::\*\*:\*\* \*:: : : : \* \*

FAM83C LLLAQEHLRHFLEMICYKMDLNGEHLPNMVRVSTCGDITYCSKAGRRTGQALEKFVLIDCE 261
FAM83A VLLDQGGVKLFQEMCDKVQISDSHLKNISIRSVEGEIYCAKSGRKFAGQIREKFIISDWR 250
FAM83G IIVDESNAVKYFLHMCERACMHLGHLKLNLRVSSSGTEFFTRSATKFKGALAQKFMFVDGD 264
FAM83F IILDEAGVKYFLEMCDLQLTDFRIRNIRVRSVTVGVGFYMPMG-RIKGTLSRFLMVDGD 252
FAM83E LLLDRQQLPAFLELAQQLGVNPNWNTENVVDRVVRGCSFQSRWRRQVSGTVREKFVLLDGE 245
FAM83H ILLDEMNAQHFLDMADKCRVNLHHVDFLRVRTVAGPTYTCRTGKSFKGHVKEKFLLDVDC 238
FAM83D ILLDQALLSQFLDMCDMLKVHPEQEKLMTVRTITGNIYYARSGTKIIGKVHEKFTLIDGI 281
FAM83B ILLDESNNFHFLLNMTKQGC SVQRLRNIRVRTVKGDYLSKTGAKFHGKMEQKFLLDVDCQ 237
::: . \* .. : : \* \* : . \* .:\* : \*

|        |                                                                 |     |
|--------|-----------------------------------------------------------------|-----|
| FAM83C | QVVAGSYSFTWLCSQAHTSMVLQLRGRIVEDFDREFRCLYAESQPVEGFCGGEDPLSPRA    | 321 |
| FAM83A | FVLSGYSYSFTWLCGHVHRNLSKFTGQAVELFDEEFRHLYASSKPVMLK-----SPRL      | 304 |
| FAM83G | RAVCGSYSFTWSAARTDRNIVSVLSGQVVMFDRQFQELYLMHSVSLKGIPEKEPEPE       | 324 |
| FAM83F | KVATGSYRFTWSSSHVDRNLLLLLTGQNVPEFDTEFRELYAISEEVDLY-----R         | 302 |
| FAM83E | RVISGYSYSFTWSDARLHRGLVTLLTGEIVDAFSLEFRTLYAASCPLPPA-----         | 294 |
| FAM83H | VVMGYSYSFMWSFEKIHRS LAHV FQ GELVSSFDEEFRILFAQSEPLVPSAAALARMDAYA | 298 |
| FAM83D | RVATGSYSFTWTDGKLNSSNLVILSGQVVEHFDLEFRILYAQSKPISPKLLSHFQSS---    | 338 |
| FAM83B | KVMYGSYSYMWSFEKAHLSMVQIITGQLVESFDEEFRRTLYARSCVPSSFAQEESARVKHG   | 297 |
|        | . *** : * : . . : * . * . * . : * : * : *                       |     |
| FAM83C | LRPPP-----                                                      | 326 |
| FAM83A | VAPVP-----                                                      | 309 |
| FAM83G | PIVLP-----                                                      | 329 |
| FAM83F | QLSLA-----                                                      | 307 |
| FAM83E | PPQKP-----                                                      | 299 |
| FAM83H | LAPYAGAGPLVGVPGVGAPTFFSFPKRAHLLFPPPREEGLGFPSFLDPDRHFLSAFRREE    | 358 |
| FAM83D | -----                                                           |     |
| FAM83B | KALWENG-----                                                    | 304 |
| FAM83C | -----VALAFRPDVPSPTSSSLPSSLSLSSIK-----                           | 352 |
| FAM83A | -----PGAAPANGRLSSSSGSASDRTSS-----                               | 332 |
| FAM83G | -----SVVPLVPAGTVAKKLVNPKYALVKAKSVDEIAKISSEKQEAKKPLGL---         | 376 |
| FAM83F | -----GRVGLHYSSTVARKLINPKYALVSG-----                             | 332 |
| FAM83E | -----SVIGGLQRGRSPHRVS-----                                      | 315 |
| FAM83H | PPRMPPGALEPHAGLRPLSRRLAEAGPAGELAGARGFFQARHLEMDAFKRHSFATEGAG     | 418 |
| FAM83D | -----NKFDHLTNRKPKQSKELT LGNLLR-----                             | 361 |
| FAM83B | -----TYQHSVSSLASVSSQRNLFGRQDKIHKLDSSYFKNRGIYTLNEHDKYNIRSHG      | 357 |
| FAM83C | -----                                                           |     |
| FAM83A | -----                                                           |     |
| FAM83G | -----K                                                          | 377 |
| FAM83F | -----                                                           |     |
| FAM83E | -----                                                           |     |
| FAM83H | AVENFAAARQVSRQTFLSHGDDFRFQTSHFHRDQLYQQQYQWDPQLTPARPQGLFEKLRG    | 478 |
| FAM83D | -----                                                           |     |
| FAM83B | -----                                                           |     |
| FAM83C | -----                                                           |     |
| FAM83A | -----                                                           |     |
| FAM83G | GPALAEHPGELPELLPPIHPGLLHLERANMFEYLPTWVEPDPEPGSDILGYINIIDPNIW    | 437 |
| FAM83F | ----CRHP-----                                                   | 336 |
| FAM83E | -----                                                           |     |
| FAM83H | GRAGFADPDDFTLGAGPRFPELGPDPGHQRLDYVPSSASREVRHGSDPAFAPGPRGLEPSG   | 538 |
| FAM83D | -----                                                           |     |
| FAM83B | YKPHFVVPNFNGPNAIRQFQPNQINENWKRHSYAGEQPETVPYLLLNRLNRTNPPGNWK     | 417 |

|        |                                                               |     |
|--------|---------------------------------------------------------------|-----|
| FAM83C | --QSPLMGRSSYLALPGGGDCSDTGCVSSSLG-----                         | 382 |
| FAM83A | ----NPFSGRS-----AGSHPGTRSVSASSG-----                          | 354 |
| FAM83G | NPQPSQMNRIKIRDTSQASAQHQLWKQSQDSR-----                         | 469 |
| FAM83F | ---PGEMMRWAARQREAGGN---PEGQEEG-----                           | 361 |
| FAM83E | -----RRRSVAPASPPFPDGF LAHRLA-----                             | 337 |
| FAM83H | APRPNLTQRFPCQAAARPGDPAPEAEPERRGGPEGRAGLRRLASYSLSGCHGEDGGDD    | 598 |
| FAM83D | -----MRLARLSSTPRKADLDPEMPAEGKAER-----                         | 388 |
| FAM83B | KPSDSLVSASSSREGYVSHHNTPAQSFANRLAQRKTTN-----LADRN              | 460 |
|        |                                                               |     |
| FAM83C | ----PARREASQPSLHRQLSDPNHGSPPGLYRANLGKLGAYPWSQSSPALNHNSTSP--   | 437 |
| FAM83A | ----PCSPAAP-----HPPPPPRFQPHQG-----PWGAPSPQAHLS-----           | 386 |
| FAM83G | ----PRPEPCP-----PPEPSAPQDGVPAENG----LPQGDPEPLPPVPKPRTVP       | 511 |
| FAM83F | ----ASGGESA-----WRLESFLKDLVTVEQV----LPPVEPIPLG-----           | 394 |
| FAM83E | ----ACRVSPA-----TPGPALSDILRSVQRARTPSGPPARPS-----              | 371 |
| FAM83H | GLPAPMEAEAYEDDLVAPGGRAPAGDLLPSAFRVPAAFPTKVPVPGPGSGGNGPEREGPE  | 658 |
| FAM83D | ---KPHDCESS-----TVSEEDYFSSHRDELQSRKAIDAATQTE-----             | 424 |
| FAM83B | SNVRRSFGNGTDNHIRFLQQRMPLEHTTKSFLRNWRIESYLNHDHSEATPDSNGSALGDRF | 520 |
|        |                                                               |     |
| FAM83C | -----TLAVGSPLLPRSRPLLQFHRGAPALS RFPENGLPGSQEPSPLRGRW          | 483 |
| FAM83A | -----PR-----PHDGGP-----                                       | 394 |
| FAM83G | VADVLARDSSDIGWVLELPKEEAPQNGTDHRLPRMAGPGHAPLQRQLSVTQDDPESLGVG  | 571 |
| FAM83F | -----ELSQKDG-----RMVSHMRDLK---PKSREAPSRNGMG                   | 425 |
| FAM83E | -----RSMWDL S RLSQLSGSSDGDNELKKS WG                           | 398 |
| FAM83H | EPGLAKQDSFRSRLNPLVQRSSRLRSSLI FSTSQAEGAAGAAAATEKVQLLHKEQTVSET | 718 |
| FAM83D | -----PGEEMPGLSVSEVGTQTSITTACAG                                | 449 |
| FAM83B | EGYDNPENLKANALYTHSRLRSSLVFKPTLPEQKEVNSCTTGSSNSTIIGSQGETPKEV   | 580 |
|        |                                                               |     |
| FAM83C | VPGTTLETVEEKEKK-----                                          | 498 |
| FAM83A | -----                                                         |     |
| FAM83G | LPNGLDGVVEEEDDDYVTLSDQDSSHSGSSGRGPG-----                      | 605 |
| FAM83F | -----                                                         |     |
| FAM83E | -----                                                         |     |
| FAM83H | LGPGGEAVRSAASTKVAELLEKYKGPARDPGGGAGAITVASHSKAVVSQAWREEVAAPGA  | 778 |
| FAM83D | -----                                                         |     |
| FAM83B | PDTPTNVQHLLTDKPLPESIPKLPLOQSEAPKMHTLQVPEN-----                | 619 |
|        |                                                               |     |
| FAM83C | -----ASPSQSRGQLDLLVPFRAREVGDPSGVT P NSGPLRPGEQAPED            | 543 |
| FAM83A | -----AAVYSNLGAYRPTRLQLEQ                                      | 413 |
| FAM83G | -----PRRPSVASSVSEEYFEVREHSVPLRRRHSEQVANGPTPPRRQLSA            | 651 |
| FAM83F | -----EAARGEAAPARRFSSR                                         | 441 |
| FAM83E | -----SKDTPAKALMRQ                                             | 410 |
| FAM83H | VGGERRSLESCLLDLRDSFAQQQLHQEAERQPGAASLTAAQLLDTLGRSGSDRLPSRFLSA | 838 |
| FAM83D | -----TQTAVITRIASSQTIIWS                                       | 467 |
| FAM83B | -----HSVALNQTTNGHTESNNYIYKTLGVNKQ TENLKNQQTENLLKRRSFPL        | 667 |

|                         |                                                               |      |
|-------------------------|---------------------------------------------------------------|------|
| FAM83C                  | RRLSPSQADSQDLDSRALGTGGAPELGSLRPGDRALEDRLSLNQSRGQSDLLMQYPKA    | 603  |
| FAM83A                  | LGLVPR-----                                                   | 419  |
| FAM83G                  | PHITRGT-----FVGPQGGSPWAQSRGEEADALKRMQ                         | 684  |
| FAM83F                  | LFSRRAK-----RPAAPNGMASSVSTETSEVEFLTGKR                        | 474  |
| FAM83E                  | RGTGGGP-----WGEVDSRPPWGGALPLPPAHLRLRYLS                       | 443  |
| FAM83H                  | QSHSTSPQGLDSPLPLEGSGAHQVLHNEKSGSPTSAYPERKGSPTPGFSTRRGSPPTGFI  | 898  |
| FAM83D                  | RSTTTQT-----DMDENILFPRGTQSTEGSPVSKMS                          | 498  |
| FAM83B                  | FDNSKANLDPGNSKHVYSTLTRNRVRQPEPKEDLLKSSKSMHNVTHNLEEDDEEVTKR    | 727  |
|                         |                                                               |      |
| FAM83C                  | QGSRVPLETNSARPARRAPDERRQTLGHSQDLITKFGPFRGEGPGNLPISSP---A      | 660  |
| FAM83A                  | -----LTPTRPFLQASPHF-----                                      | 434  |
| FAM83G                  | AQRSTDKEAQGQFHHHRVPASGTRDKDGFPPRYRSAADSVQSSTRNAGPAMAG---P     | 741  |
| FAM83F                  | PNENSSADISG-----KTSPSSAK-----PSNCVIS-----                     | 500  |
| FAM83E                  | PAR---RRFGGDATFKLQEPGRV-----PSDWAPRAGLGGQP-----               | 478  |
| FAM83H                  | EQKGSPTSAYPERRGSPVPPVPERSSPVPVPERGSLTLTISGESPKAGPAEEGSPGP     | 958  |
| FAM83D                  | VSRSSSLKSSSSVSSQGSVASSTG-----SPASIRTTDFHNPYKYLGTPHL           | 546  |
| FAM83B                  | NSPSGTTTKSVSIAALLDVNKEESNKEKELASKKEVKGSPSFLKKGSKLRSLLSLTPDKKE | 787  |
|                         |                                                               |      |
| FAM83C                  | RTAGAGSGDEKRLTLGHSKLDLITKYHQLHGARGTEPGGPKGGHLNGNSDLVRDEKRL    | 720  |
| FAM83A                  | -----                                                         |      |
| FAM83G                  | HHWQAKGGQVPRLLPDPGSPRLAQNARPMTDGRATEEHPSPFPIPYSKLSQSKHLKARTG  | 801  |
| FAM83F                  | -----                                                         |      |
| FAM83E                  | -----                                                         |      |
| FAM83H                  | MEVLRKGSRLRLRQLLSPKGERRMEDEGGFPVPQENGQPEPRRLSLGQGDSTEAAATEERG | 1018 |
| FAM83D                  | ELYLSDSLRNLNKERQFHFAGIRSRNLHMLAMLSRRTLFTENHLGLHSGNFSRVNLLAVR  | 606  |
| FAM83B                  | NLSKNKAPAFYRLCSSSDTLVSEGEENQPKKSDTKVDSSPRRKHSSSSNSQGSIHKSKE   | 847  |
|                         |                                                               |      |
| FAM83C                  | TLGHSKLDLITKYNKSKFKQLRSRFES-----                              | 747  |
| FAM83A                  | -----                                                         |      |
| FAM83G                  | GSQWASSDKRRAQAPRDRKDP-----                                    | 823  |
| FAM83F                  | -----                                                         |      |
| FAM83E                  | -----                                                         |      |
| FAM83H                  | PRARLSSATANALYSSNLRDDTKAILEQISAHGQKHRAVPAPSPGPTHNSPELGRPPAAG  | 1078 |
| FAM83D                  | DVALYPSYQ-----                                                | 615  |
| FAM83B                  | DVTVSPSQEINAPPDENKRTSPSPGPVESKFLERAGDASAPRFNTEQIQYRDSREINAVVT | 907  |
|                         |                                                               |      |
| FAM83C                  | -----                                                         |      |
| FAM83A                  | -----                                                         |      |
| FAM83G                  | -----                                                         |      |
| FAM83F                  | -----                                                         |      |
| FAM83E                  | -----                                                         |      |
| FAM83H                  | VLAPDMSDKDKCSAIFRSDSLGTQGRSLRSLPASAEERDRLLRMESMRKEKRVYSRFEV   | 1138 |
| FAM83D                  | -----                                                         |      |
| FAM83B                  | PERRPTSSPRPTSSELLRSHSTDRRVYSRFEFCKIESSIQPTSNMPTSINRPEIKSAT    | 967  |
|                         |                                                               |      |
| FAM83C, A, G, F, E, & D | -----                                                         |      |
| FAM83H                  | FCKKEEASSPGAGEGPAEEGTRDSKVGKFPKILGTFKSKK---                   | 1179 |
| FAM83B                  | MGNSYGRSSPLLNYNTGVYRSYQPNENKFRGFMQKFGNFHKNK                   | 1011 |

## Fam83h Vertebrate Homologues in Alignment

| Vertebrate   | Species                      | Accession #  |
|--------------|------------------------------|--------------|
| Human        | <i>Homo sapiens</i>          | NM_198488    |
| Mouse        | <i>Mus musculus</i>          | AK035531     |
| Bovine       | <i>Bos Taurus</i>            | XM_603315    |
| Opossum      | <i>Monodelphis domestica</i> | XM_001370407 |
| Bird         | <i>Gallus gallusor</i>       | XM_423955    |
| African Frog | <i>Xenopus laevis</i>        | BC078004     |
| Zebrafish    | <i>Danio rerio</i>           | NM_001045090 |

## Vertebrate Fam88h Alignment Summary

MARRSQSSSQGDNPLAPGYLPPHYKEYYRLAVDALAEGGSEAYSRFLATEGAPDFLCPEE  
 LEHVSRLRPFQYVTREPPEGSLLDVIDMDSGTYWPNVSDQAVPEL DLGWPLTFGFQGT  
 EVTTLVQPPPPDPSPIKDEARRMIRSAQQ/2-3/VVAVVMDMFTDVDLLSEVLEAAARRV  
 PVYILLDEMNAQHFLDMADKCRVNLHHDV/3-4/FLRVRTVAGPTYYCRTGKSFKGHVKE  
 KFLLVDCAVVMMSGSYS/4-5/FMWSFEKIHRSLAHVFQGELVSSFDEEFRI LFAQSEPLV  
 PSAAALARMDAYALAPYAGAGPLVGVPGVGA TPFSFPKRAHLLFPPPREEGLGFPSFLD  
 PDRHFLSAFRREEPPRMPGGALEPHAGLRPLSRRL EAEAGPAGELAGARGFFQARHLEMD  
 AFKRHSFATEGAGAVENFAAARQVSRQTF LSHGDDFRFQTSHFHRDQLYQQQYQWDPQLT  
 PARPQGLFEKLRGGRAFADPDDFTL GAGPRFPELGPDPGHQRLDYVPSSASREVRHGS DP  
 AFAPGPRGLEPSGAPRPNLTQRFPQAAARPGDPAPEAEPERRGGPEGRAGLRRLAS  
 YLSGCHGEDGDDGLPAPMEAEAYEDDV LAPGGRAPAGDLLPSAFRVPAAFPTKVPVPGP  
 GSGNGPEREGPEEPGLAKQDSFRSRLNPLVQRSSRLRSSLIFSTSQAEGAAGAAAATEK  
 VQLLHKEQTVSETLGPGEAVRSAASTKVAELLEKYKGPARDPGGGAGAITVASHSKAVV  
 SQAWREEVAAPGAVGGERRSLESCLLDLRDSFAQQLHQEAERQPGAASLTAAQLLDTLGR  
 SGSDRLPSRFLSAQSHSTSPQGLDSPLPLEGSGAHQVLHNESKGSPTSAYPERKGSPTPG  
 FSTRRGSPTTGFI EQKGSPTSAYPERRGSPVPPVPERSSPVPPVPERRGS LTLTISGES  
 PKAGPAEEGPGSPMEVLRKGSRLRLRQLLSPKGERRMEDEGGFPVPQENGQPE SPRRLSLG  
 QGDSTEAAATEERGPRARLSATANALYSSNLRDDTKAI LEQISAHGQKHRVAPAPSPGPT  
 HNSPELGRPPAAGVLAPDMSDKDKCSAIFRSDSLGTQGRLSRTL PASAEERDRLLRMES  
 MRKEKRVYSRFEVFCCKEEASPGAGEGPAEEGTRDSKVGKVFVKILGTFKSKK

Identical in all

High homology

Variable

**Appendix Figure 2.** CLUSTAL 2.0.10 multiple sequence alignment of vertebrate Fam83H proteins.

Key: \* identical amino acids in all; : Mostly Homologous; . Homologous

|         |                                                                         |     |
|---------|-------------------------------------------------------------------------|-----|
| Human   | MARRSQSSSQGDNPLAPGYLPPHYKEYYRLAVDALAEGGSEAYSRFLATEGAPDFLCPEE            | 60  |
| Mouse   | MARRSQSSSQGDNPLAPGYLPPHYKEYYRLAVDALTEGGPEAYNRFLASEGAPDFLCPEE            | 60  |
| Bovine  | MARRSQSSSQGDNPLAPGYLPPHYKEYYRLAVDALAEGGPEAYSRFLASEGAPAFLCPEE            | 60  |
| Opossum | MALE--RSREGRD-----VRELQGLCVSLSAGVGPSSP-----                             | 31  |
| Bird    | MARRSQSSSQGDNPLDPNYLPPHYKEYYRLALDILTEEGKESYERFLAEEGAPDFLCNSE            | 60  |
| Frog    | MAHRSQSSSQGDNPLDPNYLPPHYKEYYRIAIDVLAERGPEDYEQFLIEEGVPDFLCPSE            | 60  |
| Zfish   | MARRSQSSSLGDNPLDPNYLRPHYREYYRMAIDALVEDDIEGYNFLQANVVDFLSRSE              | 60  |
|         | ** . * * : : * : : . . . .                                              |     |
| Human   | LEHVSRLRPPQYVTR---PPEGSLLDVMMDGSSSGTYWPNVDQAVPELDLWGWLPTFG-             | 116 |
| Mouse   | LEHVSRLRPPQYVARE---PPEGTPSDVMMDGSSSGTYWPNVDQAVPELDLWGWLPTFG-            | 116 |
| Bovine  | LEHVSRLRPPQHVAPE---PPDGSPNLDLFDGSSSGTYWPNVDQAVPELDLWGWLPTFG-            | 116 |
| Opossum | -----PPQRCCPG---RPGRHR-----GGWAGLWGEACSVRGAGRQGAASGW-                   | 73  |
| Bird    | VDHILQNLQKPYANQE---GGTDTAGDNDVDGSSSGTYWPMNSDLAVPELDLWGWPMVFG-           | 116 |
| Frog    | VEHITKCFQRPPECSQENQYPDNVYSTQEEADGSSSGTYWPMESDTAAPELDLWGPITYG-           | 119 |
| Zfish   | IENIKSTVQTPQSAGNV---PELPYGEIDQDESSDQTYWPLHSDLDAPGLDLGWPMQOHS            | 116 |
|         | * . : * : . .                                                           |     |
| Human   | -FQGTEVTTLVQPPPPDPSIKDEARRMIRSAQQVAVVMDMFTDVDLLSEVLEAAARRV              | 175 |
| Mouse   | -FQGTEVTTLVQPPPPDPSIKDEARRMIRSAQQVAVVMDMFTDVDLLSEVLEAAARRV              | 175 |
| Bovine  | -FQGTEVTTLVQPPPPDPSIKDEARRMIRSAQQVAVVMDMFTDVDLLSEVLEAAARRV              | 175 |
| Opossum | -GAGTEGTTWARHRVTG-----HLQRALDLHLDQVVAIVMDMFTDVDLLSEILEAAARRV            | 127 |
| Bird    | -FRGTEVTTLVQPPPPDNPSIKEEARRMIRAAQQVVAIVMDVFTDVDLLFEVLDAAARRV            | 175 |
| Frog    | -FQGTEVTTLVHPPSPDNPTIKEEIRRMIRSAQQVIGIVMDIFTDADILSELLDAANRRI            | 178 |
| Zfish   | FVGPTEVTMLVNPAPERPSIKEQARRLIKNAHQVIAVMDIFTDVIDIFSDLLEAAARRHV            | 176 |
|         | ** * . . . * : . ** : : ** : ** * : : ** * * : :                        |     |
| Human   | PVYILLDEMNAQHFLDMADKCRVNLHHVDFLRVRTVAGPTYTCRTGKSFKGHVKEKFLLV            | 235 |
| Mouse   | PVYILLDEMNAQHFLDMADKCRVNLHHVDFLRVRTVAGPTYTCRTGKSFKGLKKEKFLLV            | 235 |
| Bovine  | PVYILLDEMNAQHFLDMADKCRVNLHHVDFLRVRTVAGPTYTCRTGKSFKGHVKEKFLLV            | 235 |
| Opossum | PVYILLDEMNAQHFLDMAEKCRVNLHHVDFLRVRTVSGPTYTCRTGKSFKGHVKEKFLLV            | 187 |
| Bird    | PVYILLDEMNSQLFLDTAAKCRVNLNYVEFLRVRTVSGPTYTCRTGMSFKGHVKEKFLLV            | 235 |
| Frog    | PVYIILDQMNCQLFLDMAAKCRVNLNYVEFLRVRTVPGPTYFCRNQTTFKGNLQEKFLLV            | 238 |
| Zfish   | PVYILLDEQNAHYFVNMVASCNVLEMIHMMRVRTVSGVTYFCRTGKSFQVMDRFLLT               | 236 |
|         | **** : ** : * . : * : . . * : ** . : : : ** * * . * * : ** : : : ** * . |     |
| Human   | DCAVVMGSYSFMWSFEKIHRSLAHVFQGELVSSFDEEFRILFAQSEPLVPSAAALAR--             | 293 |
| Mouse   | DCAVVMGSYSFMWSFEKIHRSLAHVFQGELVSSFDEEFRILFAQSEPLVPSAGALAR--             | 293 |
| Bovine  | DCAVVMGSYSFMWSFEKIHRSLAHVFQGELVSSFDEEFRILFAQSEPLVPSAGALAR--             | 293 |
| Opossum | DCAVVLSGSYSFMWSFEKIHRSLAHVFQGELVSSFDEEFRILFAQSEPLIPAAGALALAL            | 247 |
| Bird    | DCMVVLSGNYSFMWSFEKIHRSLAHVFQGELVSSFDEEFRILFAQSEPLVPPANVLAK--            | 293 |
| Frog    | DCTVVLSGTYSMWSFEKIHRSLAHVFQGELVSSFDEEFRILFAQSDPLIPSEALAMMD              | 298 |
| Zfish   | DCRAVISGNYSFMWSFEKIHRSLAHVFQGELVATFDEEFRILFAQSQPLVVENALVPMP-            | 295 |
|         | ** . * : ** . ***** . : ** : * ***** : ***** : ** : . .                 |     |
| Human   | --MDAYALAPYAGAGPLVGVPGVGAPTPFSFPKRAHLLFPPPREEGLGFPSF-LDPDRHF            | 350 |
| Mouse   | --MDAYALAPYSGAGPLVGVPGVGAPTPFSFPKRAHLLFPPPREEGLGFPSF-LDPDRHF            | 350 |
| Bovine  | --MDTYALAPYAGAGPLMGSPGAPTPFSFPKRAHLLFPPPREEGLGFPSF-LDPDRHF              | 350 |
| Opossum | THADTYALTPYGGPGPLMGGP-MGGPGSF-FPKRAHLLFPP-RDEGLGFPSF-LDPDRHF            | 303 |

|         |                                                               |     |
|---------|---------------------------------------------------------------|-----|
| Bird    | -AENPFAMTPFGNNMPF-----FPKKSPLMFQRDDNLFPSFMDR-VDPDRFF          | 338 |
| Frog    | --KSYMGMVFPAGPRPM-----FDRKLHFMYPREENPSQPFPSFGVDPDRHY          | 343 |
| Zfish   | --QDSYLGNGQFG-----LKRTQSLRNPRGYLRQPELGGYQYGDRLDS              | 335 |
|         | . : . : : . .                                                 |     |
| Human   | LSAFRREEPPRMPGGALEPHAGLRPLSRRLEAEAGPAGELAGARGFFQARHLE-MDAFKR  | 409 |
| Mouse   | LSAFRREELQRMPPGGALEPHTGLRPLAR--PTEAGPFGELAGPRGFFQSRHLE-MDAFKR | 407 |
| Bovine  | LSAFRREESSRMPGGALEPHTGLRPLSRRLEAEAGPAGELAGARGFFQARHLE-MDAFKR  | 409 |
| Opossum | LSAFRRDILLRHSGGAGDIHG-LRMLSR--EMEAGNSGDP-GSRGFLRAKHLE-MDAFKR  | 358 |
| Bird    | LSNFRRDDMLRHT-----VEGSAMRMYKKVEMEN---AQMDPVRGFRLRSKQLE-LDAFKR | 389 |
| Frog    | FQSFRRDDMMRQN-----MDPAGMRMYAKNFGDPMQMSFIQNKQLEALEAYKR         | 394 |
| Zfish   | ILPFRDDPFRHTIEP--SAGPMQVTKYATQQFRMQQSFLDQGRSMLASRQLE-MNAFKR   | 392 |
|         | : ***:: * : : : ** : : ** : : **                              |     |
| Human   | HSFAT-EGAGAVENFAAARQVS-RQTFLS-HGDDFRFQTSHFHRDQLYQQQYQWDPQLTP  | 466 |
| Mouse   | HSYATPDGAGAVENFAAARQVS-RQTFLS-HGDDFRFQTSHFQRDQLYQQHYQWDPQFAP  | 465 |
| Bovine  | YSYAADGAGAVENLAAARQVS-RQTFLS-HGDDLRFQTSHFHRDQLYQQHYQWDPQLAP   | 467 |
| Opossum | HNFAD----GAVENFAASRQVS-RQMFVS-HGDDFRFQTSHFHRDQLYQQHYQFEPQFTA  | 412 |
| Bird    | HSFAE----GTFENFASSKQYA-RQMFMN-NMDEFKIQSSHFQKQDFYQ--YQFEHPLS   | 441 |
| Frog    | HSFAE----GTFENYTSRQYSSRQMLMNNNDEYRFQSSQVQKSQFMQ----FQSPLAT    | 446 |
| Zfish   | HSYAE----GTRETYASSRQYMKQRMN-----LEETESHYQREQHYQ-----SEGMG     | 438 |
|         | ::* * : * . : : : * : : . . * : : : *                         |     |
| Human   | ARPQGLFEKLRGGRAGFADPDD----FTLGAGPRFPPELGP-----DGHQRLDYVPS     | 513 |
| Mouse   | ARPQGLFEKLRAGRPGFADPDD----FALGAGHRFPPELGA-----DVHQRLEYVPS     | 512 |
| Bovine  | TRPQGLFEKLRAGRPGFDPHDE----FMLGTGPRFPPELGL-----DGHQRLDYVPS     | 514 |
| Opossum | TRPQGLFEKLRAGRPGFGEPEP----FGIDGSPHFPELEPGFGPHPEGPGGHLRLDYVPS  | 468 |
| Bird    | GRPQGFDFDIRGGRPGFNELEEGP-LPYGEGPRYHELESGFPQE----GFPLRLDYVPS   | 496 |
| Frog    | TRPQGLFEKIRGGRQGLQEMDEFDSRYPNKGLPGESHFALE-----GPPMRPGYNV      | 498 |
| Zfish   | HDDRGHYDRFNYGLADQHSDSG-----YPPELEAP-----GNINV                 | 473 |
|         | :* : : : . * . . . : :                                        |     |
| Human   | SASREVRHGSDPAFAPGPRGLEPSGAPRPNLTQRFPCQAAARPG-----PDPAPEA      | 564 |
| Mouse   | SASREVRHGSDPAFGPSPRGLEPSGASRPNLGQRFPCQATLRQG-----LDTASEA      | 563 |
| Bovine  | SASREVRHGSDPAFGPGPRGLEPSGAPRPNLGQRFSCQAMTRLG-----PEMAPEP      | 565 |
| Opossum | SASREVRHGSD----PEPRGLEPGAPQRPNIQRFQCSPTQKQSLRWFPPPEAPEM       | 524 |
| Bird    | NSSREVRHGSD-QLNPAGNGPMGMLRRQNIQKFCQTSPTQKQSLRQ-LFLQDKDED      | 554 |
| Frog    | NSSREVKHGSD----QAVIGGEGRFQGRSLGRQKFCVQISPTQKQG-----MEQKHFFHD  | 549 |
| Zfish   | LSSDDLKSDSEKQYNIGGR-YDPQGHKRPAAAGHAYACQSSPTQPHPPDQK---QLFSTGD | 529 |
|         | :* : : : . * : : * : : **                                     |     |
| Human   | EPERRGGPEGRAGLRRLASYSLSGCHGEDGGDDGLPAPMEAEAYEDDVLAPGGRA--PA   | 622 |
| Mouse   | EPERRGGPEGRAGLRHWRLASYSLSGCHG-DGGEGLP--MEAEACEDEVLPAGGR-----  | 615 |
| Bovine  | EPEHRGGPEGRAGLRHWRLTSYLSGCHSEDAGDEGLPTMETEAYDDDDVLVSGGRA--TA  | 623 |
| Opossum | EPSRKGGAEGRAGLRNWRISSYLSGCHS-DGGDEGLPGPMEAEASYDEVLDGPTGRFPLPT | 583 |
| Bird    | QDQDKSTQENRTGLRNWRISSYLSAYQS--EPEEGLPMPMESEAYNDVLGDPLTKHP---  | 609 |
| Frog    | QDADKKPPENKQGLRSWRISSYLSGIQS-DQDEEGLPIPLEPELYDDALVPVERAVP---  | 605 |
| Zfish   | QVRQSQDPSVKQGLRSWRINSYLSYED--GGEEGLHPMGSDAFEDSHQPPDSRLYGSE    | 587 |
|         | : . : *** ** : **** . . : : ** : : : :                        |     |



Human GDLLPSAFRVPAAFPTKV-----PVPG 644  
 Mouse -DLLPSAFRTPAAFPAG-----PKPG 636  
 Bovine GDLLPSAFRVPAFPFGK-----PAPG 645  
 Opossum GDLPSFRTGGSFPPK----- 600  
 Bird TDLIP-AFKSPISFNSKS-----LG-V 629  
 Frog -----ASETLLKYSTDP----- 617  
 Zfish GPGIHSNIRERPNIPTKPNLDRPRFGKPIIQDRNQVKDNTSDLGPTSTDTLKPAISASS 647

Human PGSGG-NGPEREGPEEPGLAKQDSFRSRLNPLVQRSSRLRSSLIFSTSQAEAGAAG---AA 700  
 Mouse SGSGGGDSSEREGPEETS LAKQDSFRSRLNPLIQRSSRLRSSLIFAS-QAEGAVGT--AA 693  
 Bovine SGSGGGDGPEREGL EEVGLAKQDSFRSRLNPLIQRSSRLRSSLIFASQEGGTGGP--TG 703  
 Opossum -ALGGGDGPEREVTEGVTL SKQDSFRSRLNPLIQRSSRLRSSLIFSSSQKEGPGVGPAG 659  
 Bird ENAKEFADPERGG-EEAPMMKQDAFRTRINPLIQRSSRLRSSLIFNAAKLDQPNT----- 683  
 Frog --MQPYKSSLVPHNVFPDRSNENFMKYSDMPVQLHKPSVPSQDVPMLERAGAGNESLMK 675  
 Zfish LASSTDNEKELAEPREISITKHESFRTRINPMLQRSSRLRSSLIFSSSKLEQHNSQAKS 707

::: :: ::\*: :. : \*

Human AATEKVQLLHKEQTVSETLPGGGEAVRSAASTKVAELLEKYKGPARD----PGGGAGAIT 756  
 Mouse ATTEKVQLMHKEQTVSETLPGSGEAVRSSASAKVAELLEKYKGPARD----PGGAGGAVT 749  
 Bovine ASTEKVQLLHKEQTVSEMLPGGNEAVRSAASTKVAELLEKYKGPSRD----PGGVGTAVT 759  
 Opossum ATNEKVQLFQKEQTVSETVGEGETVRTASSKVAELLEKYKGPARDRDRDQDRTGGLVT 719  
 Bird -TVEKVQMIHKEQVSELTKD-NETIKTAASSKVAELLEKYKAVGKD-----AERA 732  
 Frog YSVNPIPPFKSSSDVPTLFRIVPAIENLS-KYSLEPIPPYKNFGST-----GELS 725  
 Zfish GGELQEEKEESEPIRYSSIVAEILEKRRSLSREPFWDNKKHKADEKD--VKHASTGDLTT 765

... . : \*

Human VASHKAVVSQAWREEVAAPG-AVGGER-RSLESCLLDLRDS--FAQ-QLHQEAERQPGA 811  
 Mouse SSSHKAVVSQAWREEVAPG-GAGTER-RSLESCLLDLRDS--FAQ-QLHQEAERHPGA 804  
 Bovine AASHKAVVSQAWREEVSAPGGGSGSER-RSLESCLLDLRES--FAQ-QLHQEAERQPGA 815  
 Opossum VSSHKA AVTQAWREETGTGSGGKGER-RSLESCLLDLRDS--FAN-RLHEESERQPGA 775  
 Bird TVTHTKAVSSFLQEESQNAEKKCTKSVQYKILES RVLESKDS--CSTYKMHGETDRFTFGM 790  
 Frog VEKPKETPPAEKEKEEALLSRHDSFRTRTNPLIQRSRLRSSLIFSSSKLEQHTSTTESI 785  
 Zfish IQDTKEEPIKEKEKPDNPKPEENKVTQPTVPSASQQITSSLMNDPASRLQYFKDQOQEKR 825

:: . . . . :::

Human ASLTAAQLLDTLGR-----SGSDRLPSRFLSAQSHSTSPQGLDSPLPL----- 854  
 Mouse ASLTAAQLLDTLG-----GTDRLPSRFLSAQGRSLSPQGRDSPPP----- 844  
 Bovine ATLASTQLLDTLGRG-----SSGTDRLPSRFLSTQGHSTSPQGRDSPPP----- 859  
 Opossum ATLSAAQLLDTLGR-----GTDRLPSRFLASDGRAALPQGKASPPPERKGSPTP 824  
 Bird SS-STPQLIDALSKDPLAH---LGTKVDKLSRFYPMENKPALPEKESLIFVG----- 839  
 Frog QEMQQAQSTSEVVSE-----NETEKTTSRVAEILQKYRGVSRDS----- 824  
 Zfish KTSKLELDLGTKSQEAAIKKPETLDTATKVPDVLITSEQSTVKAQEPTVSQTDFVPHRPV 885

: . . . .

Human ---EGSGAHQVLHNESKG----- 869  
 Mouse ---EGLGTHQLPYSEPKGNPTPAYPERKGS PAPANPERKGSPTPAYPERKGSPTPAYPER 901  
 Bovine ---EGPGGQQ---SEPKG----- 871  
 Opossum VYPERKGSVPPVPERKGS PILAYPERKGSVPPVPERKGSPTTAYPERKGSVPPPIPER 884  
 Bird -----  
 Frog -----  
 Zfish IETKPKPSEVSVD RPYTTN-----K 905

|         |                                                              |      |
|---------|--------------------------------------------------------------|------|
| Human   | --SPTSAYPERKGSPTPGFSTRRGSPTTGFIQKGSPTSAYPERRGS-----PV        | 916  |
| Mouse   | KGSPTQAYPERKGSPTSGFPNRRGSPTTGLMEQKGSPTSTYPDRRGS-----PV       | 950  |
| Bovine  | --SPTLAYPERKGSPTPGFPTRRGSPTAGFTEQKGSPTSAYPERRGS-----PV       | 918  |
| Opossum | KGSPTSTYPERKGSVPPIPERKGSPTSAYLERKGSPTSAYPERKGSPTSAYPDQRSSPF  | 944  |
| Bird    | -DTQKLALPEKKERVTFKEDAELKLVSAELKK-----                        | 869  |
| Frog    | --NSTTMTQAKAASRT-----IHEESEDGQCTSTEAVAY-----                 | 856  |
| Zfish   | TLTESIADAPKKEPVKEPTKSLKPFPSPKFLKPFKSSQSSSRRISCG-----E        | 953  |
|         | . . : : . . :                                                |      |
| Human   | PPVPERRSSPVPPVPERRGSLTLTISGESPKAGPAEEGPGS-----PMEVLRKGSRLRQ  | 971  |
| Mouse   | PPVPERRGSPVPPVPERRG--SLTFAGESSTGTPTTEEVSSG-----PMEVLRKGSRLRQ | 1003 |
| Bovine  | PPVPERRGSPVPPVPERRGSLTLPFSGESPKAGPTEEAVGG-----PMEVLRKGSARLRQ | 973  |
| Opossum | PPVSEWRDNPIPPVPERKS--SLTFSGDTQKIGSAGEEDAGRSEPSPMFLRKGSHRLKQ  | 1002 |
| Bird    | PQVRTGATSAIENLSKGQG-----SDSSLNRSEEECSKQ--EQNTMEFLRKGSLRQ     | 920  |
| Frog    | -KAVESAIDKNGSVSRMQQ-----ESQYKSVATSHLEG-----LLSKEQQSFMSK      | 901  |
| Zfish   | EILTDATDAEKSELKKSRSFSTSGMSRTEPRESLSLGNSESKDTKALDFLKKQTQRLKG  | 1013 |
|         | : . : : . . : :                                              |      |
| Human   | LLSPKGERRMEDEGGFPVQENGQPEsprRLSLGQGDSTEAAATEE-----           | 1016 |
| Mouse   | LLSPKNERRGEDEGSFPTQENGQPEsprRPSLSRGDSTEAAAE-----             | 1048 |
| Bovine  | LMSPKGERRADDEGSFPTQENGQPESPQWPSLVRVDSTEAAAE-----             | 1018 |
| Opossum | LLSPKGEKLEEEGGFGPQENGQPEGPHRP--SRGDSPELGVED-----             | 1045 |
| Bird    | FLNPKGEKKLEEEPNSEIGKSDKQPMGLKRS--SMGDCQEMLGEEKNHKFATLLPPKSS  | 978  |
| Frog    | VEQVTSSIQTIGNISSALPERNESGPTVTEPVEEHKQSSISHMQQ-----           | 946  |
| Zfish   | ILGPKGDKKHSVNSQEDKSMKTVPEVQEEISDKGKPSESISSTAVEN-----KPSA     | 1067 |
|         | . . . : . : . . . .                                          |      |
| Human   | RGPRARLSSATANALYSSNLRDDTKAILEQISAHGQKHRVAVPASP-----GPTHNSPEL | 1071 |
| Mouse   | RGSRVRLASATANALYSSNLRDDTKAILEQISAHGQKHRGVPAP-----GPAHSSPDV   | 1101 |
| Bovine  | RGPRARVASATANALYSSNLRDDTKAILEQISAHGQKHRGVPAPGP-----TPAHSSPEL | 1073 |
| Opossum | RGSRSLASATANALYSSNLRDDTKVILEQISAHGQKHRGGAGSGGGTGTGGAHSSPEL   | 1105 |
| Bird    | QPTQGRFPSSSTANILYSSNLRDDTKVILEQISANSQKNRAELAKQL-----PSTSNPDL | 1032 |
| Frog    | ---ESHYKSVVTSQLDGLLNRDHQVISMSKVEQKTSSVQTIGNISP-----APPENRES  | 997  |
| Zfish   | KPTTSRYQSSTSNIFSSNLRDDTKVILEQISANSQKTRQQNEESG-----           | 1113 |
|         | : * . . : . ** . : . . : . . :                               |      |
| Human   | GRPPAAGVLAP---DMSDKDKCSAIFRSDSLGTQGRSRTLPASAEERDRLLRMESMRK   | 1128 |
| Mouse   | GRPTTAGDLAP---DMSDKDKCSAIFRSDSLGTQGRSRTLPASAEERDRLLRMESMRK   | 1158 |
| Bovine  | GHPVAVAGGLAP---DMSDKDKCSAIFRSDSLGTQGRSRTLPASAEERDRLLRMESMRK  | 1130 |
| Opossum | YRSPAAALDASRAHEMSDKDKCSAIFRSDSFGGQSRFSRTLPASLEERDRLLRMESMRK  | 1165 |
| Bird    | SKSTMSLERKT-----EKEKSCNIHRSEFSGQKRNLRQPS--EDRDTLLKKNEMMRK    | 1084 |
| Frog    | GPTITELTEVP-----QTPENAPIRSNSSFHFGSALESMSQNPTPSSSLNKSEDLAK    | 1050 |
| Zfish   | -----KGDGGKDDVANSFPQSRNRFSRAPVNPQERDNLKRIESMRK               | 1155 |
|         | : : * . . * : * . : *                                        |      |
| Human   | EKRVSRYFEVFCCKEEASS--PGAGE-GPAEEGTRDSKVGKFPKILGTFKSKK        | 1179 |
| Mouse   | EKRVSRYFEVFCCKDEAGS--SGAGD-NLADEDTRDSKMGKFPKILGTFKSKK        | 1209 |
| Bovine  | EKRVSRYFEVFCCKKEEPGA--LGAAE-GPAEEDARDSKVGKFPKILGTFKSKK       | 1181 |
| Opossum | EKRVSRYFEVFCCKEDSGAGEAGAGETGASEADTRDRKVGKFPKILGTFKTKK        | 1219 |
| Bird    | EKRVSRYFEVFCCKDEHTS--QSEEE---YDTDAKDKKMGKFPKILGTFKTKK        | 1133 |
| Frog    | TDQNFLRKGSIKQLQFLQS----KAE-----KSKK                          | 1076 |
| Zfish   | EKKVYSRYFEVLYRSRECCWERSVE-----QANQFLIKSIE-----               | 1192 |
|         | . : : * : . . :                                              |      |
